# Supplementary material for: Clathrin-mediated post-fusion membrane retrieval influences the exocytic mode of endothelial Weibel-Palade bodies
Source: Oxford University Press journal article supplement (doi:10.1242/jcs.200840), 2017-07-04
Supplement: jcs200840supp.pdf [file jcs200840supp.pdf]

## Supplementary Figures

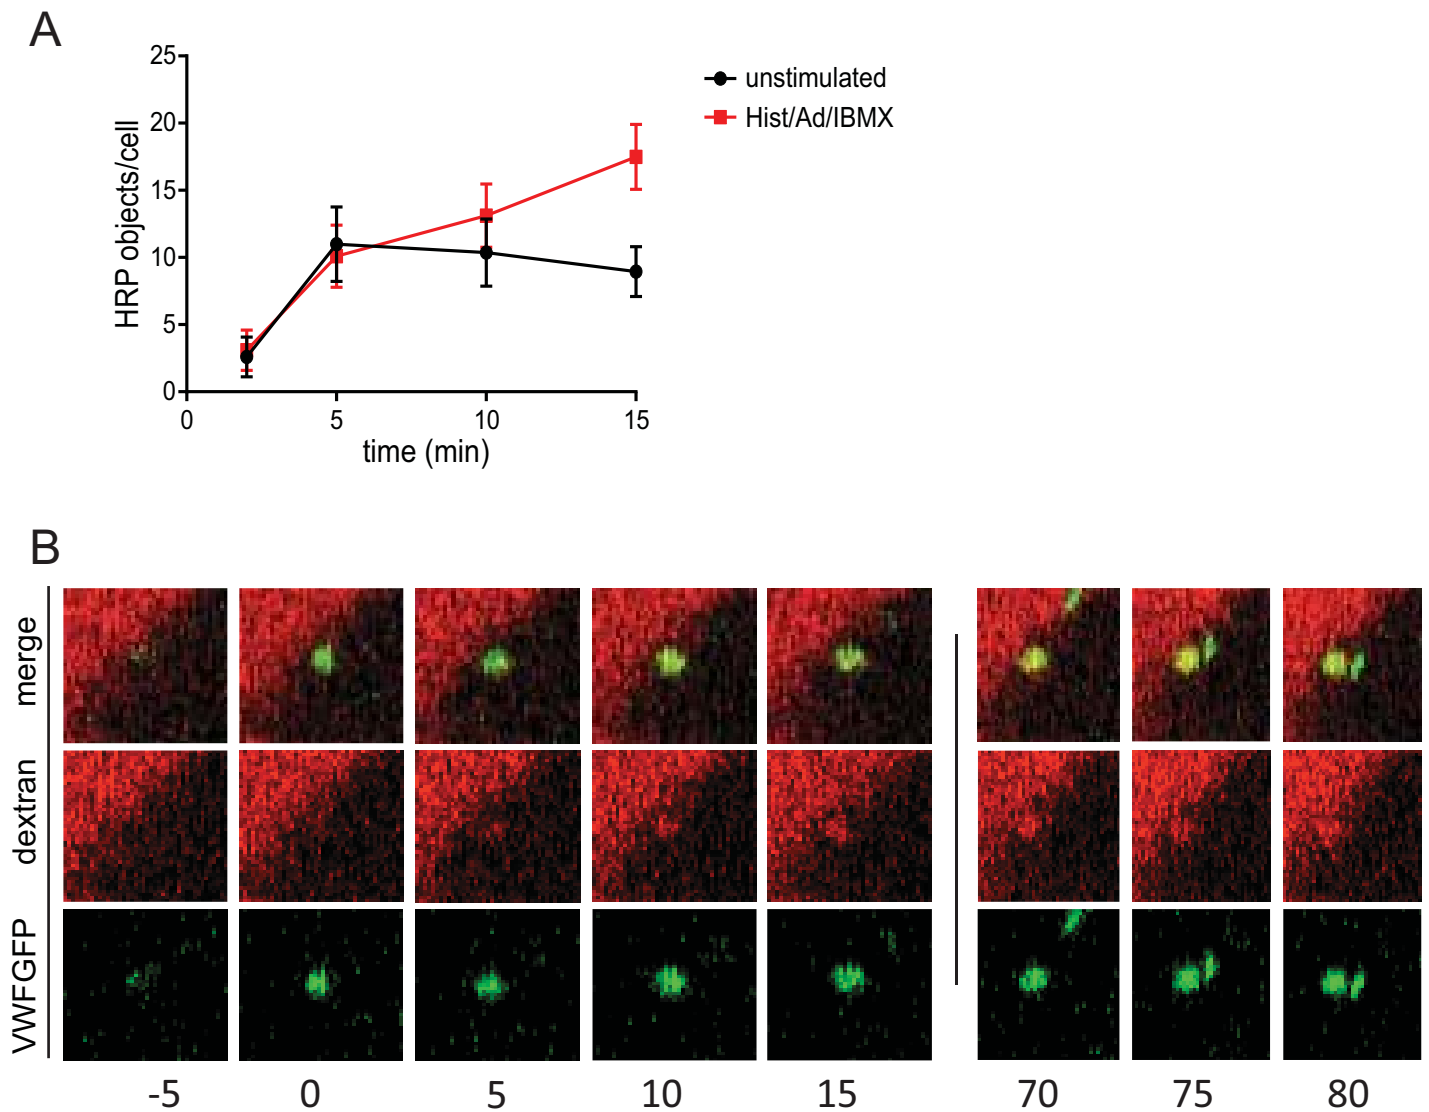

**Figure S1. Live cell imaging of dextran incorporation into fused WPB**

(A) HUVEC were incubated with HRP +/- a cocktail of Histamine (100 $\mu$ M), Adrenaline (10 $\mu$ M) and IBMX (100  $\mu$ M) for 15 minutes. The number of HRP positive objects/cell was determined and plotted relative to time. (B) HUVECs expressing VWF-GFP (green) were imaged live in the presence of PMA (100ng/ml) and dextran-tetramethylrhodamine (red). One representative exocytic event is presented, which occurs at relative time 0 (time indicated underneath pictures in seconds). Images are single confocal planes. The fusion pore can be seen to fill with dextran, whereas a second WPB, which comes into focus and does not fuse, does not co-localise with dextran.

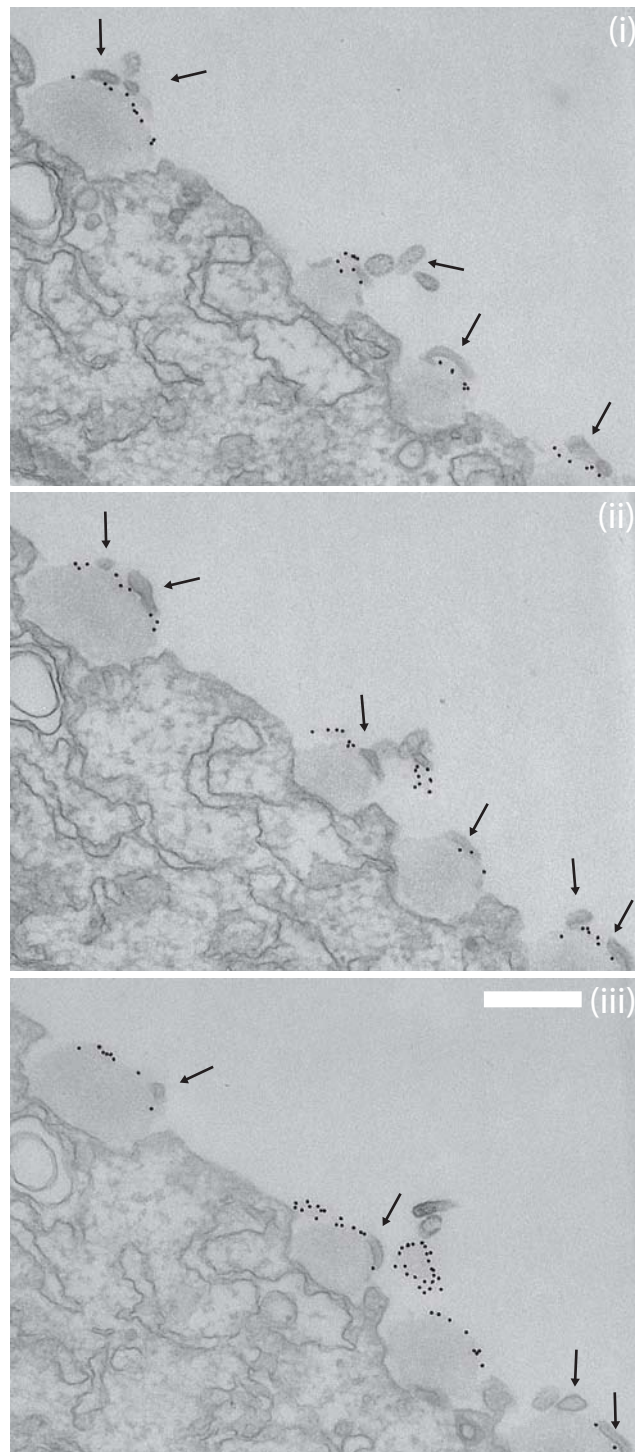

**Figure S2. Multiple incomplete fusion events are apparent even in close proximity following actin depolymerisation**

HUVEC were stimulated with PMA (100ng/ml) for 10 minutes in media supplemented with 1 $\mu$ M cytochalasin E (CCE). Cells were then fixed and external VWF labelled with anti-VWF antibodies before preparation for TEM. Serial sections are shown. Arrows show pieces of membrane still present around the fused exocytic structure, scale bar 500nm.

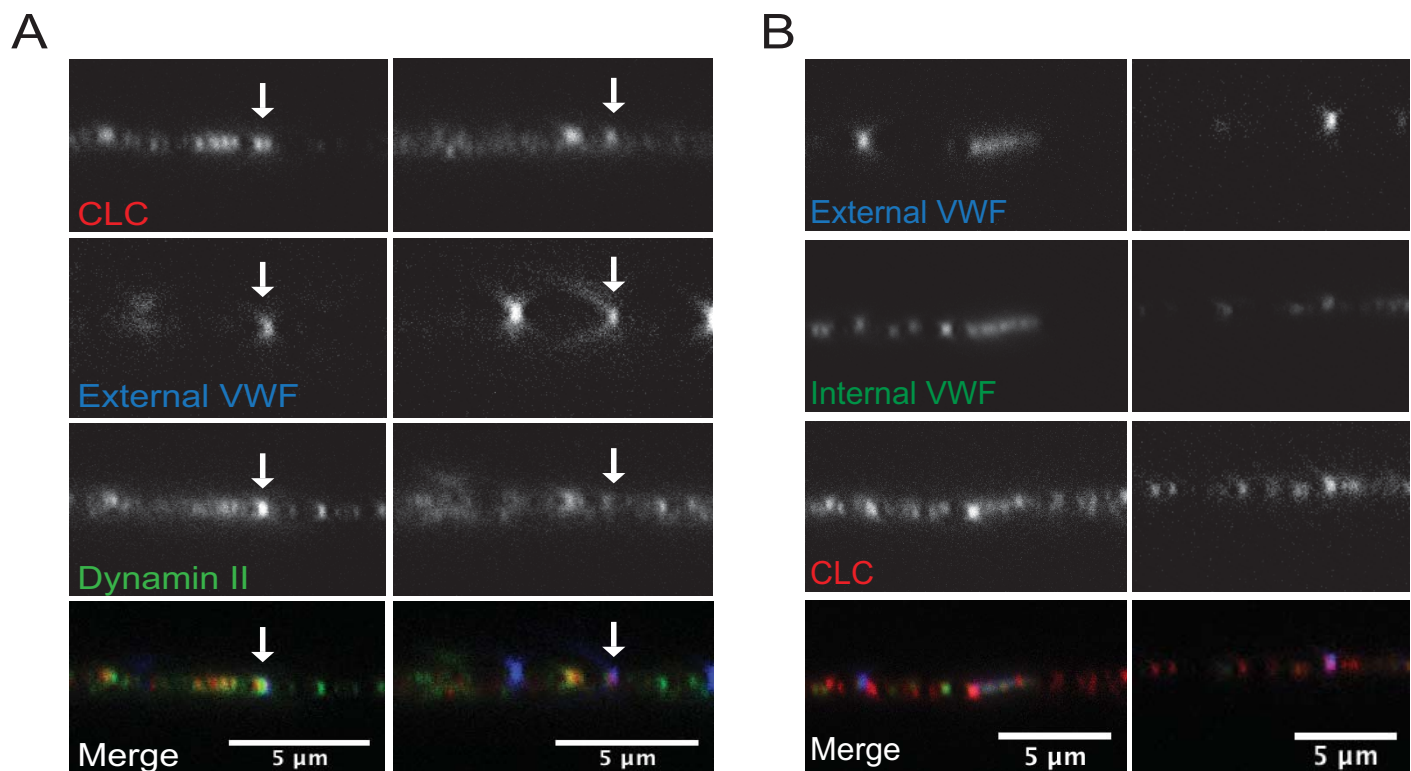

**Figure S3. Clathrin and sometimes dynamin II co-localise with sites of string release**

(A) Confluent HUVECs were stimulated with 100ng/ml PMA for 5 minutes at 37°C then fixed and stained for external VWF (blue), dynamin II (green) and CLC (red). Cells were then imaged by confocal microscopy in the longitudinal plane to examine co-localisation between exocytosed VWF and clathrin at the exocytic pore. Single plane images are presented. Scale bar 5 μm. (B) Confluent HUVECs were stimulated with 100ng/ml PMA for 5 minutes at 37°C then fixed and stained for external VWF (blue), total VWF (green) and CLC (red). Cells were then imaged by confocal microscopy in the longitudinal plane to examine co-localisation between exocytosed VWF and clathrin at the exocytic pore. Single plane images are presented. Scale bar 5 μm.

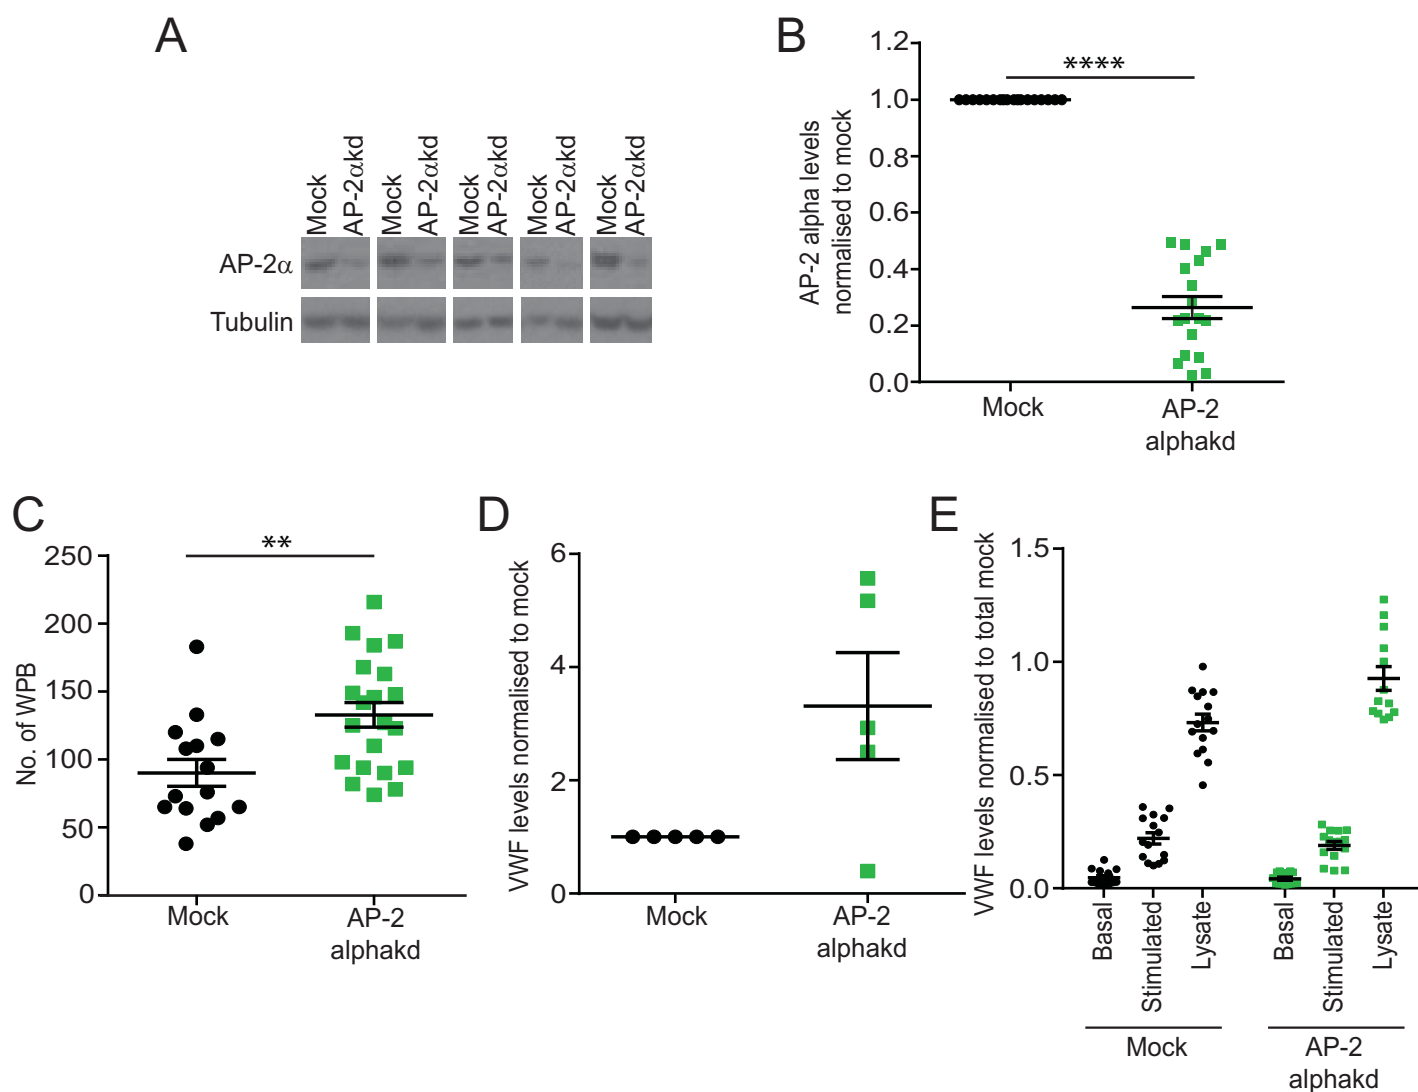

**Figure S4. siRNA mediated knockdown of AP-2 alpha increases the number of WPB in endothelial cells.**

(A-E) HUVEC were transfected with 300 pmol siRNA targeting AP-2 alpha for one or two rounds. (A & B) The extent of kd was determined by SDS PAGE and western blot. (A) Examples of western blots from 5 separate experiments showing AP-2 kd vs. the loading control  $\beta$ -tubulin. (B) Quantification of kd normalised to  $\beta$ -tubulin and relative to the mock, kd efficiency was on average 74% over 19

experiments. Error bars show SEM and statistics shown derived from unpaired student's T test on raw data ( $P < 0.0001$ ). (C) At the second round of AP-2 alpha kd transfection 5 $\mu$ g GFP-VWF was incorporated and the cells were imaged live on a scanning confocal microscope. Images were taken and the number of WPB determined using Fiji and an arbitrary threshold. The number of WPB following AP-2 alpha kd was significantly increased. Error bars show SEM and statistics shown derived from unpaired student's T test ( $P < 0.005$ )  $n=5$  experiments. (D) Quantification of VWF levels normalised to  $\beta$ -tubulin and relative to the mock, error bars show SEM  $n=5$  experiments. (E) VWF levels as determined by ELISA. The amount of unreleased VWF in lysates was higher in AP-2 alpha kd cells compared to mock treated controls, error bars show SEM for  $n=5$  experiments.

**Table S1 – Co-localisation between internalised fluid-phase HRP and other proteins**

SD = standard deviation. Data is the mean of 8-12 fields of view

| Marker      |     | Unstimulated cells | Stimulated cells   | Student's t-test   |
|-------------|-----|--------------------|--------------------|--------------------|
| EEA1        | tM1 | 0.182 (SD = 0.046) | 0.161 (SD = 0.038) | $P = 0.285$        |
|             | tM2 | 0.166 (SD = 0.038) | 0.147 (SD = 0.063) | $P = 0.278$        |
| P-selectin  | tM1 | 0.195 (SD = 0.137) | 0.207 (SD = 0.091) | $P = 0.745$        |
|             | tM2 | 0.03 (SD = 0.054)  | 0.111 (SD = 0.068) | $P = 0.000063$ *** |
| Transferrin | tM1 | 0.162 (SD = 0.037) | 0.117 (SD = 0.117) | $P = 0.421$        |
|             | tM2 | 0.162 (SD = 0.030) | 0.175 (SD = 0.063) | $P = 0.261$        |
